# Supplementary material
Source: publisher site journal article supplement (https://www.dovepress.com/article/546854)
Supplement: Supplementary file 1 [file 546854_Revised%20Supplementary%20material.pdf]

**Supplementary Table 1 List of HPV genetic instruments.**

| Exposure | CHR | POS       | SNP        | Effect allele | Other allele | Beta   | SE    | P-value  | EAF      | Sample | COVID-19 IV | Severe COVID-19 IV | Hospitalized COVID-19 IV | R <sup>2</sup> | F      |
|----------|-----|-----------|------------|---------------|--------------|--------|-------|----------|----------|--------|-------------|--------------------|--------------------------|----------------|--------|
| HPV-16   | 1   | 37479392  | rs548661   | T             | G            | -0.196 | 0.045 | 1.62E-05 | 0.38     | 997    | rs548661    | rs548661           | rs548661                 | 3.74E-05       | 18.775 |
| HPV-16   | 1   | 71154117  | rs1334997  | T             | C            | 0.192  | 0.046 | 3.39E-05 | 0.354    | 997    | rs1334997   | rs1334997          | rs1334997                | 3.46E-05       | 17.347 |
| HPV-16   | 1   | 194104179 | rs6670046  | T             | C            | 0.443  | 0.097 | 5.15E-06 | 0.038    | 997    | rs6670046   | rs6670046          | rs6670046                | 4.19E-05       | 21.013 |
| HPV-16   | 1   | 242522042 | rs2919024  | A             | G            | -0.781 | 0.185 | 2.77E-05 | 0.013    | 997    | rs2919024   | rs2919024          | rs2919024                | 3.54E-05       | 17.732 |
| HPV-16   | 2   | 55970893  | rs17047217 | A             | G            | -0.715 | 0.175 | 4.72E-05 | 0.03     | 997    | rs17047217  | rs17047217         | rs17047217               | 3.33E-05       | 16.703 |
| HPV-16   | 2   | 60866057  | rs6719607  | G             | A            | 0.245  | 0.059 | 3.55E-05 | 0.178    | 997    | rs6719607   | rs6719607          | rs6719607                | 3.44E-05       | 17.256 |
| HPV-16   | 2   | 179421694 | rs9808377  | A             | G            | -0.252 | 0.053 | 1.96E-06 | 0.25     | 997    | rs9808377   | rs9808377          | rs9808377                | 4.57E-05       | 22.906 |
| HPV-16   | 3   | 54264197  | rs9830760  | T             | C            | 0.304  | 0.067 | 6.67E-06 | 0.135    | 997    | rs9830760   | rs9830760          | rs9830760                | 4.09E-05       | 20.503 |
| HPV-16   | 3   | 145529197 | rs2864426  | C             | G            | -0.237 | 0.057 | 3.69E-05 | 0.165    | 997    | ~           | ~                  | ~                        | 3.43E-05       | 17.181 |
| HPV-16   | 5   | 27610789  | rs7447521  | C             | A            | 0.374  | 0.091 | 4.18E-05 | 0.079    | 997    | rs7447521   | rs7447521          | rs7447521                | 3.38E-05       | 16.941 |
| HPV-16   | 6   | 24931083  | rs216259   | G             | A            | 0.212  | 0.050 | 2.14E-05 | 0.284    | 997    | rs216259    | rs216259           | rs216259                 | 3.64E-05       | 18.241 |
| HPV-16   | 6   | 65433784  | rs985915   | G             | A            | 0.224  | 0.054 | 3.59E-05 | 0.201    | 997    | rs985915    | rs985915           | rs985915                 | 3.44E-05       | 17.231 |
| HPV-16   | 6   | 81380831  | rs2503718  | A             | G            | 0.560  | 0.126 | 9.99E-06 | 0.051    | 997    | rs2503718   | rs2503718          | rs2503718                | 3.93E-05       | 19.714 |
| HPV-16   | 9   | 1358244   | rs682927   | G             | T            | -0.205 | 0.046 | 8.34E-06 | 0.437    | 997    | rs682927    | rs682927           | rs682927                 | 4.00E-05       | 20.070 |
| HPV-16   | 9   | 95589160  | rs7850036  | C             | T            | 0.244  | 0.053 | 4.49E-06 | 0.203    | 997    | rs7850036   | rs7850036          | rs7850036                | 4.24E-05       | 21.280 |
| HPV-16   | 11  | 80884316  | rs10897761 | T             | C            | -0.441 | 0.094 | 3.55E-06 | 0.066    | 997    | rs10897761  | rs10897761         | rs10897761               | 4.34E-05       | 21.743 |
| HPV-16   | 13  | 48650492  | rs41284209 | A             | G            | 0.295  | 0.066 | 9.84E-06 | 0.134    | 997    | rs41284209  | rs41284209         | rs41284209               | 3.94E-05       | 19.749 |
| HPV-16   | 13  | 50005050  | rs28692644 | A             | G            | 0.351  | 0.085 | 3.60E-05 | 0.074    | 997    | rs28692644  | rs28692644         | rs28692644               | 3.44E-05       | 17.231 |
| HPV-16   | 13  | 109504132 | rs7339361  | T             | C            | 0.341  | 0.078 | 1.34E-05 | 0.066    | 997    | rs7339361   | rs7339361          | rs7339361                | 3.82E-05       | 19.141 |
| HPV-16   | 14  | 87365603  | rs8016986  | C             | T            | -0.335 | 0.072 | 3.90E-06 | 0.115    | 997    | rs8016986   | rs8016986          | rs8016986                | 4.30E-05       | 21.548 |
| HPV-16   | 17  | 9713505   | rs4791360  | G             | A            | -0.201 | 0.046 | 1.56E-05 | 0.348    | 997    | rs4791360   | rs4791360          | rs4791360                | 3.76E-05       | 18.853 |
| HPV-16   | 18  | 37304602  | rs1513688  | C             | T            | 0.229  | 0.054 | 2.46E-05 | 0.242    | 997    | rs1513688   | rs1513688          | rs1513688                | 3.58E-05       | 17.961 |
| HPV-16   | 18  | 44040660  | rs17766830 | T             | C            | 0.211  | 0.050 | 2.44E-05 | 0.262    | 997    | rs17766830  | rs17766830         | rs17766830               | 3.59E-05       | 17.978 |
| HPV-18   | 1   | 75700632  | rs12743566 | A             | G            | 0.332  | 0.081 | 4.90E-05 | 0.089    | 997    | rs12743566  | rs12743566         | rs12743566               | 3.32E-05       | 16.630 |
| HPV-18   | 1   | 168683476 | rs35449613 | C             | T            | 0.393  | 0.092 | 2.34E-05 | 0.029752 | 997    | rs35449613  | rs35449613         | rs35449613               | 3.60E-05       | 18.062 |
| HPV-18   | 2   | 116955767 | rs4849449  | C             | T            | -0.195 | 0.044 | 1.07E-05 | 0.423    | 997    | rs4849449   | rs4849449          | rs4849449                | 3.91E-05       | 19.581 |
| HPV-18   | 4   | 58935390  | rs930937   | G             | T            | 0.334  | 0.076 | 1.32E-05 | 0.09     | 997    | rs930937    | rs930937           | rs930937                 | 3.82E-05       | 19.176 |
| HPV-18   | 5   | 6621031   | rs4702371  | A             | G            | -0.221 | 0.049 | 5.86E-06 | 0.327    | 997    | rs4702371   | rs4702371          | rs4702371                | 4.14E-05       | 20.757 |

|        |    |           |            |   |   |        |       |          |       |     |            |            |            |          |        |
|--------|----|-----------|------------|---|---|--------|-------|----------|-------|-----|------------|------------|------------|----------|--------|
| HPV-18 | 5  | 79809658  | rs249011   | A | T | -0.193 | 0.043 | 1.00E-05 | 0.468 | 997 | ~          | ~          | ~          | 3.93E-05 | 19.714 |
| HPV-18 | 5  | 118837658 | rs257969   | T | C | -0.193 | 0.046 | 3.31E-05 | 0.367 | 997 | rs257969   | rs257969   | rs257969   | 3.47E-05 | 17.389 |
| HPV-18 | 8  | 73443576  | rs4738265  | C | T | 0.223  | 0.049 | 6.16E-06 | 0.277 | 997 | rs4738265  | rs4738265  | rs4738265  | 4.12E-05 | 20.666 |
| HPV-18 | 8  | 84495551  | rs7820513  | G | A | -0.239 | 0.054 | 1.09E-05 | 0.175 | 997 | rs7820513  | rs7820513  | rs7820513  | 3.90E-05 | 19.545 |
| HPV-18 | 10 | 59333071  | rs2393316  | A | G | 0.577  | 0.138 | 3.12E-05 | 0.017 | 997 | rs2393316  | rs2393316  | rs2393316  | 3.49E-05 | 17.506 |
| HPV-18 | 11 | 73259543  | rs11235802 | A | C | -0.317 | 0.075 | 2.24E-05 | 0.091 | 997 | rs11235802 | rs11235802 | rs11235802 | 3.62E-05 | 18.139 |
| HPV-18 | 12 | 3818665   | rs241993   | T | C | -0.204 | 0.043 | 2.70E-06 | 0.498 | 997 | rs241993   | rs241993   | rs241993   | 4.44E-05 | 22.288 |
| HPV-18 | 16 | 8510914   | rs3901280  | T | C | 0.179  | 0.044 | 4.63E-05 | 0.475 | 997 | rs3901280  | rs3901280  | rs3901280  | 3.34E-05 | 16.744 |

**Abbreviations:** HPV-16: human papilloma virus E7 type 16; HPV-18: human papilloma virus E7 type 18; appendicular lean mass; CHR: chromosome; POS: position; SNP: single nucleotide polymorphism; SE:

standard error of beta; EAF: effect allele frequency; ~ palindrome SNP.

**Supplementary Table 2 List of COVID-19 genetic instruments**

| Exposure              | CHR | POS       | SNP         | Effect allele | Other allele | Beta   | SE    | P-value  | EAF     | Sample    | HPV-16 IVs  | HPV-18 IVs  | R <sup>2</sup> | F        |
|-----------------------|-----|-----------|-------------|---------------|--------------|--------|-------|----------|---------|-----------|-------------|-------------|----------------|----------|
| COVID-19              | 1   | 155105882 | rs4971066   | G             | T            | -0.077 | 0.013 | 1.02E-08 | 0.1777  | 1,683,768 | —           | —           | 1.95E-05       | 32.81576 |
| COVID-19              | 3   | 101433440 | rs10936744  | T             | C            | -0.063 | 0.010 | 3.51E-10 | 0.3588  | 1,683,768 | rs34376498# | rs34376498# | 2.34E-05       | 39.36792 |
| COVID-19              | 3   | 45847241  | rs17078348  | G             | A            | 0.092  | 0.016 | 1.20E-08 | 0.0997  | 1,683,768 | —           | —           | 1.93E-05       | 32.49434 |
| COVID-19              | 3   | 45838013  | rs2271616   | T             | G            | 0.156  | 0.015 | 3.61E-25 | 0.1181  | 1,683,768 | —           | —           | 6.38E-05       | 107.4253 |
| COVID-19              | 9   | 136142355 | rs643434    | A             | G            | 0.101  | 0.010 | 1.29E-23 | 0.371   | 1,683,768 | rs643434    | rs643434    | 5.96E-05       | 100.3165 |
| COVID-19              | 12  | 113406945 | rs757405    | A             | T            | 0.069  | 0.011 | 1.64E-10 | 0.7092  | 1,683,768 | —           | —           | 2.43E-05       | 40.85888 |
| COVID-19              | 21  | 34611571  | rs12482060  | G             | C            | 0.062  | 0.011 | 3.96E-09 | 0.3375  | 1,683,768 | —           | —           | 2.06E-05       | 34.64591 |
| Hospitalized COVID-19 | 3   | 45889921  | rs35081325  | T             | A            | 0.488  | 0.032 | 3.68E-54 | 0.08122 | 1,887,658 | —           | —           | 1.27E-04       | 240.1278 |
| Hospitalized COVID-19 | 9   | 136149229 | rs505922    | C             | T            | 0.112  | 0.019 | 4.42E-09 | 0.3501  | 1,887,658 | rs505922    | rs505922    | 1.82E-05       | 34.43301 |
| Hospitalized COVID-19 | 12  | 113357442 | rs2660      | A             | G            | 0.116  | 0.019 | 2.00E-09 | 0.6902  | 1,887,658 | rs2660      | rs2660      | 1.91E-05       | 35.97152 |
| Hospitalized COVID-19 | 19  | 4719443   | rs2109069   | A             | G            | 0.151  | 0.020 | 2.94E-14 | 0.3227  | 1,887,658 | —           | —           | 3.06E-05       | 57.77857 |
| Hospitalized COVID-19 | 21  | 34615210  | rs13050728  | C             | T            | -0.168 | 0.020 | 7.44E-17 | 0.6528  | 1,887,658 | —           | —           | 3.68E-05       | 69.55039 |
| Severe COVID-19       | 3   | 45889921  | rs35081325  | T             | A            | 0.626  | 0.045 | 5.75E-45 | 0.07529 | 1,388,342 | —           | —           | 1.43E-04       | 197.9816 |
| Severe COVID-19       | 6   | 31121232  | rs111837807 | C             | T            | 0.295  | 0.043 | 5.66E-12 | 0.0996  | 1,388,342 | rs17190776# | rs17190776# | 3.42E-05       | 47.44419 |
| Severe COVID-19       | 7   | 107607902 | rs2237698   | T             | C            | 0.237  | 0.040 | 2.41E-09 | 0.08971 | 1,388,342 | —           | —           | 2.56E-05       | 35.60821 |
| Severe COVID-19       | 12  | 113382977 | rs2384074   | T             | C            | 0.198  | 0.028 | 2.10E-12 | 0.6756  | 1,388,342 | rs2285932#  | rs2285932#  | 3.56E-05       | 49.38281 |
| Severe COVID-19       | 12  | 103014757 | rs10860891  | A             | C            | -0.239 | 0.040 | 1.64E-09 | 0.8855  | 1,388,342 | —           | —           | 2.62E-05       | 36.36407 |
| Severe COVID-19       | 17  | 47940666  | rs77534576  | T             | C            | 0.460  | 0.075 | 8.52E-10 | 0.03465 | 1,388,342 | —           | —           | 2.71E-05       | 37.63604 |
| Severe COVID-19       | 19  | 4719443   | rs2109069   | A             | G            | 0.257  | 0.028 | 6.12E-20 | 0.3287  | 1,388,342 | —           | —           | 6.02E-05       | 83.5852  |
| Severe COVID-19       | 21  | 34615210  | rs13050728  | C             | T            | -0.200 | 0.029 | 2.44E-12 | 0.6627  | 1,388,342 | —           | —           | 3.54E-05       | 49.09655 |

**Abbreviations:** HPV-16: human papilloma virus E7 type 16; HPV-18: human papilloma virus E7 type 18; appendicular lean mass; CHR: chromosome; POS: position; SNP: single nucleotide polymorphism;

SE: standard error of beta; EAF: effect allele frequency; # proxy SNP; —SNP cannot be found in outcome GWAS data.

**Supplementary Table 3 MR estimate results of HPV on outcomes**

| Exposure | Outcome               | Methods         | Nsnp | Beta   | SE    | P value | OR    | or_lci95 | or_uci95 | Horizontal pleiotropy |       |         |                     |                 | Heterogeneity      |         |
|----------|-----------------------|-----------------|------|--------|-------|---------|-------|----------|----------|-----------------------|-------|---------|---------------------|-----------------|--------------------|---------|
|          |                       |                 |      |        |       |         |       |          |          | MR-Egger regression   |       |         | MR-PRESSO           |                 | Cochran's <i>Q</i> | P value |
|          |                       |                 |      |        |       |         |       |          |          | Egger intercept       | SE    | P value | Global test P value | Pleiotropic SNP |                    |         |
| HPV-16   | COVID-19 infection    | Weighted median | 22   | 0.006  | 0.014 | 0.690   | 1.006 | 0.979    | 1.033    | -0.009                | 0.009 | 0.308   | 18.622              | 0.757           | 14.023             | 0.869   |
|          |                       | MR Egger        | 22   | 0.033  | 0.031 | 0.294   | 1.034 | 0.973    | 1.099    |                       |       |         |                     |                 |                    |         |
|          |                       | Weighted mode   | 22   | 0.007  | 0.024 | 0.772   | 1.007 | 0.960    | 1.057    |                       |       |         |                     |                 |                    |         |
|          |                       | IVW             | 22   | 0.003  | 0.010 | 0.782   | 1.003 | 0.983    | 1.024    |                       |       |         |                     |                 |                    |         |
| HPV-16   | Hospitalized COVID-19 | Weighted median | 22   | 0.022  | 0.027 | 0.423   | 1.022 | 0.969    | 1.077    | 0.009                 | 0.016 | 0.599   | 14.089              | 0.934           | 12.279             | 0.932   |
|          |                       | MR Egger        | 22   | -0.013 | 0.059 | 0.822   | 0.987 | 0.879    | 1.108    |                       |       |         |                     |                 |                    |         |
|          |                       | Weighted mode   | 22   | 0.028  | 0.051 | 0.588   | 1.028 | 0.931    | 1.136    |                       |       |         |                     |                 |                    |         |
|          |                       | IVW             | 22   | 0.016  | 0.021 | 0.434   | 1.016 | 0.976    | 1.058    |                       |       |         |                     |                 |                    |         |
| HPV-16   | Severe COVID-19       | Weighted median | 22   | 0.028  | 0.046 | 0.534   | 1.029 | 0.941    | 1.126    | -0.020                | 0.026 | 0.442   | 25.355              | 0.426           | 23.026             | 0.343   |
|          |                       | MR Egger        | 22   | 0.089  | 0.091 | 0.340   | 1.093 | 0.915    | 1.305    |                       |       |         |                     |                 |                    |         |
|          |                       | Weighted mode   | 22   | 0.080  | 0.084 | 0.351   | 1.083 | 0.919    | 1.276    |                       |       |         |                     |                 |                    |         |
|          |                       | IVW             | 22   | 0.022  | 0.032 | 0.490   | 1.023 | 0.960    | 1.089    |                       |       |         |                     |                 |                    |         |
| HPV-18   | COVID-19 infection    | Weighted median | 12   | -0.027 | 0.021 | 0.192   | 0.973 | 0.935    | 1.014    | 0.004                 | 0.015 | 0.772   | 15.134              | 0.388           | 12.947             | 0.297   |
|          |                       | MR Egger        | 12   | -0.040 | 0.062 | 0.534   | 0.961 | 0.850    | 1.085    |                       |       |         |                     |                 |                    |         |
|          |                       | Weighted mode   | 12   | -0.024 | 0.037 | 0.527   | 0.976 | 0.908    | 1.049    |                       |       |         |                     |                 |                    |         |
|          |                       | IVW             | 12   | -0.022 | 0.016 | 0.164   | 0.978 | 0.948    | 1.009    |                       |       |         |                     |                 |                    |         |
| HPV-18   | Hospitalized COVID-19 | Weighted median | 12   | -0.057 | 0.042 | 0.174   | 0.945 | 0.871    | 1.025    | 0.030                 | 0.027 | 0.292   | 13.039              | 0.554           | 10.957             | 0.447   |
|          |                       | MR Egger        | 12   | -0.155 | 0.112 | 0.197   | 0.856 | 0.687    | 1.067    |                       |       |         |                     |                 |                    |         |
|          |                       | Weighted mode   | 12   | -0.067 | 0.068 | 0.348   | 0.935 | 0.818    | 1.069    |                       |       |         |                     |                 |                    |         |
|          |                       | IVW             | 12   | -0.035 | 0.029 | 0.237   | 0.966 | 0.912    | 1.023    |                       |       |         |                     |                 |                    |         |
| HPV-18   | Severe COVID-19       | Weighted median | 12   | -0.037 | 0.057 | 0.512   | 0.963 | 0.862    | 1.077    | 0.018                 | 0.040 | 0.668   | 6.024               | 0.959           | 4.647              | 0.947   |
|          |                       | MR Egger        | 12   | -0.122 | 0.169 | 0.486   | 0.885 | 0.636    | 1.232    |                       |       |         |                     |                 |                    |         |
|          |                       | Weighted mode   | 12   | 0.005  | 0.088 | 0.951   | 1.005 | 0.847    | 1.194    |                       |       |         |                     |                 |                    |         |
|          |                       | IVW             | 12   | -0.050 | 0.044 | 0.251   | 0.951 | 0.873    | 1.036    |                       |       |         |                     |                 |                    |         |

**Abbreviations:** HPV-16: human papilloma virus E7 type 16; HPV-18: human papilloma virus E7 type 18; SE: standard error of beta; IVW: inverse variance weighted.

**Supplementary Table 4 MR estimate results of COVID-19 on outcomes**

| Exposure              | Outcome | Methods | Nsnp | Beta   | SE    | P value | OR    | or_lci95 | or_uci95 | Heterogeneity      |         |
|-----------------------|---------|---------|------|--------|-------|---------|-------|----------|----------|--------------------|---------|
|                       |         |         |      |        |       |         |       |          |          | Cochran's <i>Q</i> | P value |
| COVID-19 infection    | HPV-16  | IVW     | 2    | 0.314  | 0.486 | 0.519   | 1.368 | 0.528    | 3.549    | 1.574              | 0.210   |
| Hospitalized COVID-19 | HPV-16  | IVW     | 2    | 0.250  | 0.379 | 0.510   | 1.284 | 0.611    | 2.698    | 1.727              | 0.189   |
| Severe COVID-19       | HPV-16  | IVW     | 2    | 0.161  | 0.172 | 0.349   | 1.175 | 0.838    | 1.647    | 0.092              | 0.762   |
| COVID-19 infection    | HPV-18  | IVW     | 2    | -0.158 | 0.387 | 0.683   | 0.854 | 0.400    | 1.823    | 0.031              | 0.860   |
| Hospitalized COVID-19 | HPV-18  | IVW     | 2    | -0.550 | 0.635 | 0.386   | 0.577 | 0.166    | 2.002    | 4.881              | 0.027   |
| Severe COVID-19       | HPV-18  | IVW     | 2    | 0.224  | 0.221 | 0.312   | 1.251 | 0.810    | 1.931    | 1.660              | 0.198   |

**Abbreviations:** HPV-16: human papilloma virus E7 type 16; HPV-18: human papilloma virus E7 type 18; SE: standard error of beta; IVW: inverse variance weighted.

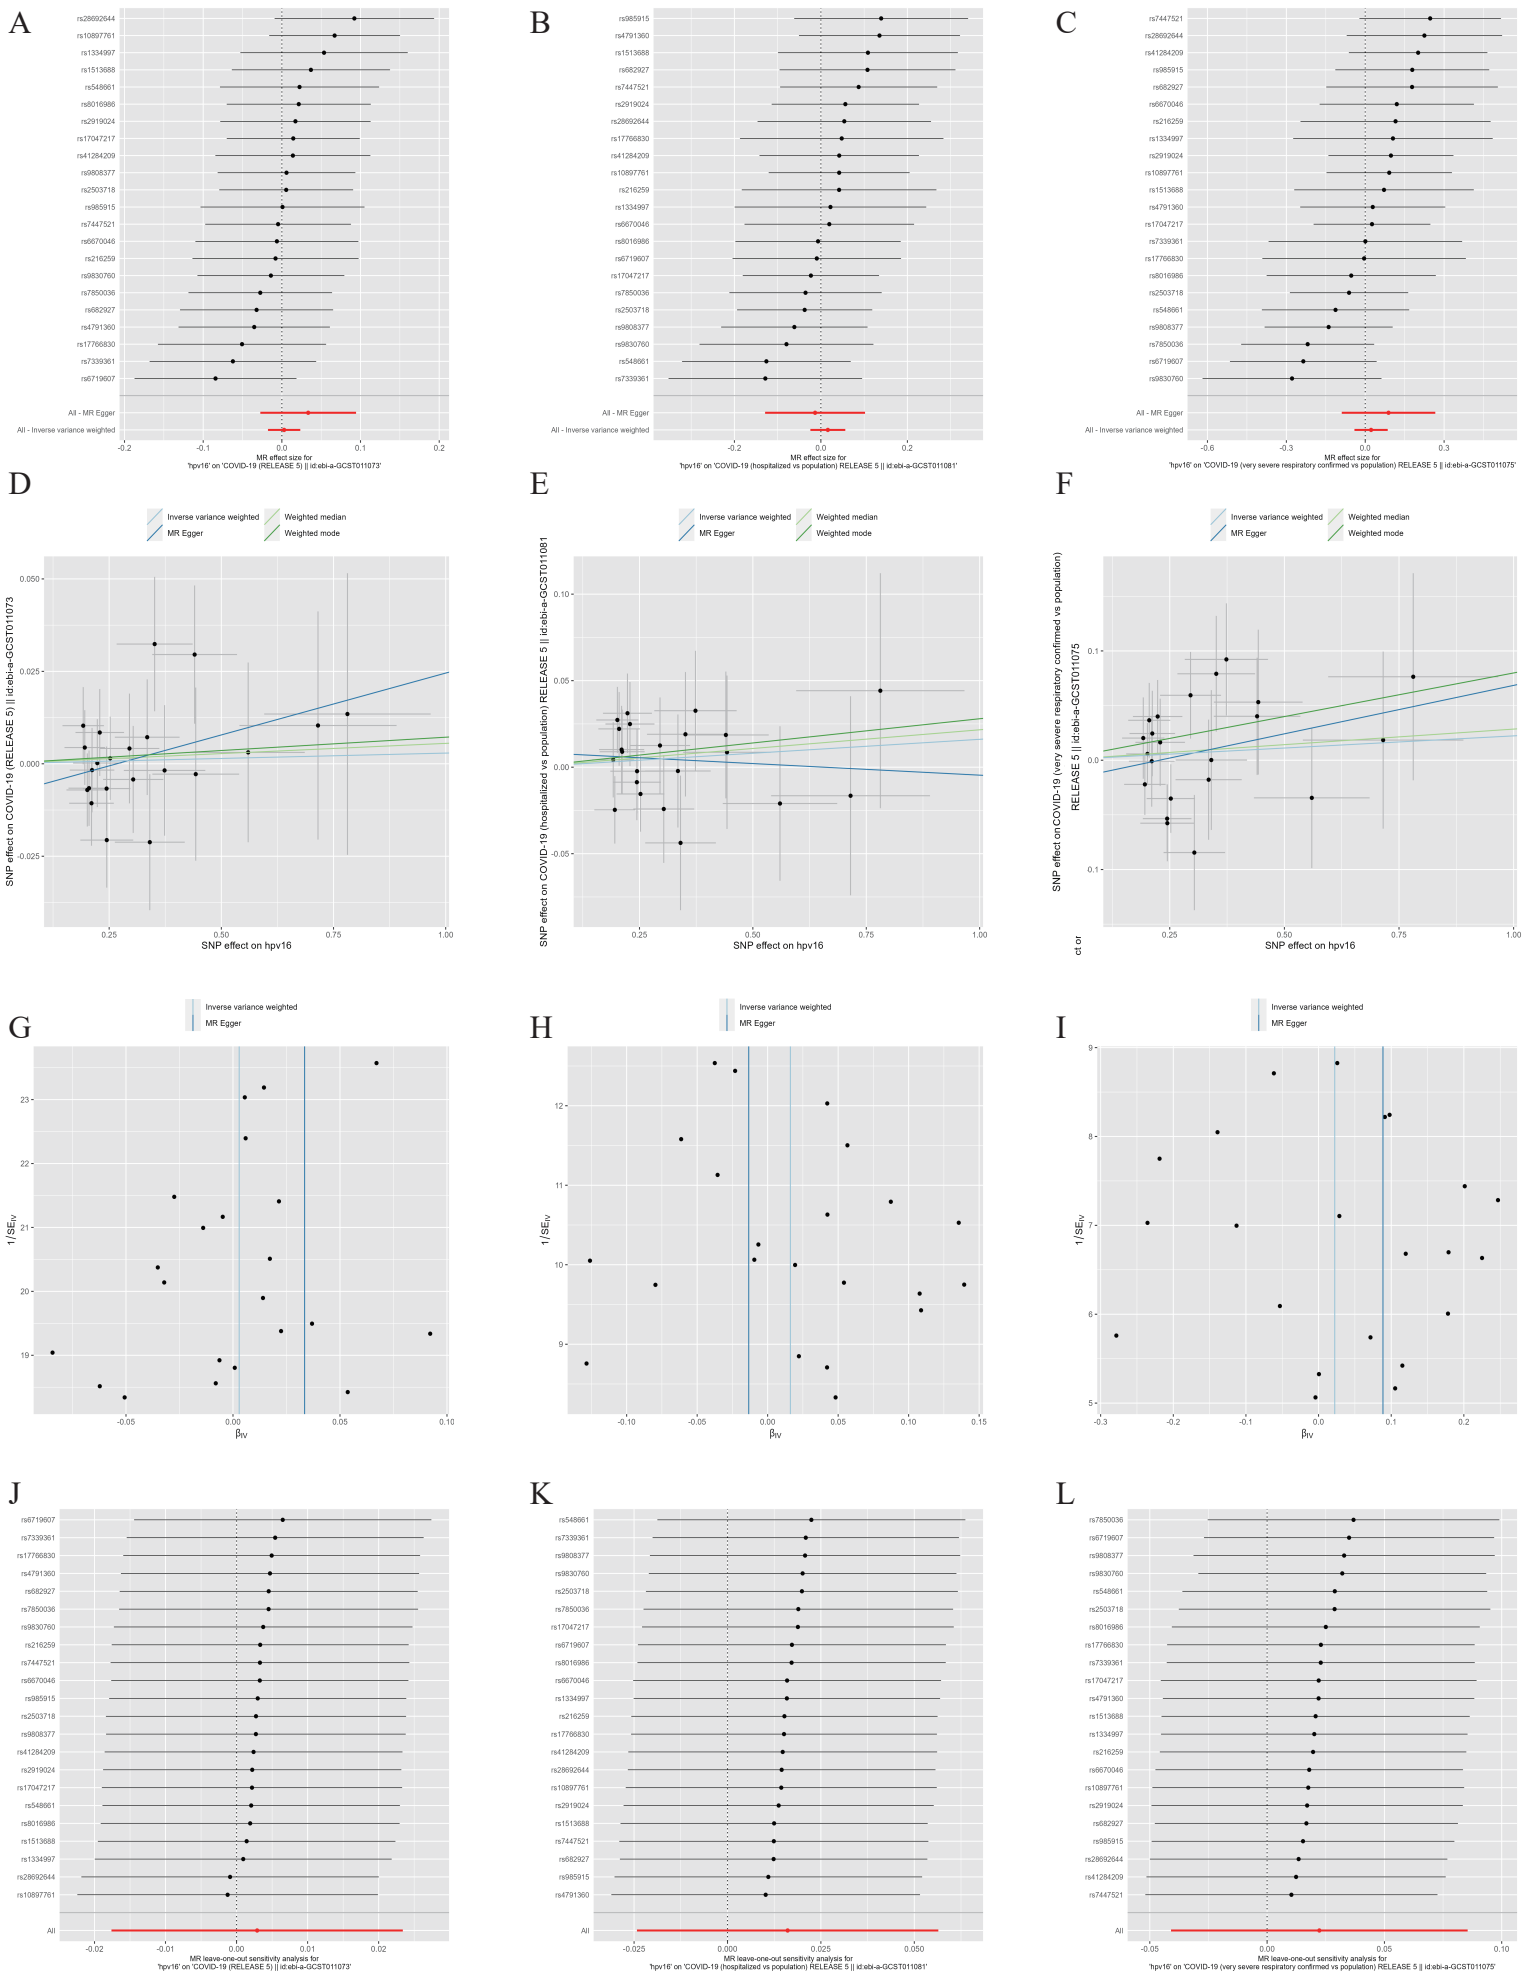

**Supplementary Figure 1.** MR estimate results of HPV-16 on outcomes

**Note:** A: Forest plot of HPV-16 on COVID-19; B: Forest plot of HPV-16 on hospitalized COVID-19; C: Forest plot of HPV-16 on severe COVID-19;

D: Scatter plot of HPV-16 on COVID-19; E: Scatter plot of HPV-16 on hospitalized COVID-19; F: Scatter plot of HPV-16 on severe COVID-19;

G: Funnel plot of HPV-16 on COVID-19; H: Funnel plot of HPV-16 on hospitalized COVID-19; I: Funnel plot of HPV-16 on severe COVID-19;

J: Leave-one-out plot of HPV-16 on COVID-19; K: Leave-one-out plot of HPV-16 on hospitalized COVID-19; L: Leave-one-out plot of HPV-16 on severe COVID-19;

MR: Mendelian randomization; HPV-16: human papillomavirus type 16; COVID-19: coronavirus disease 2019.

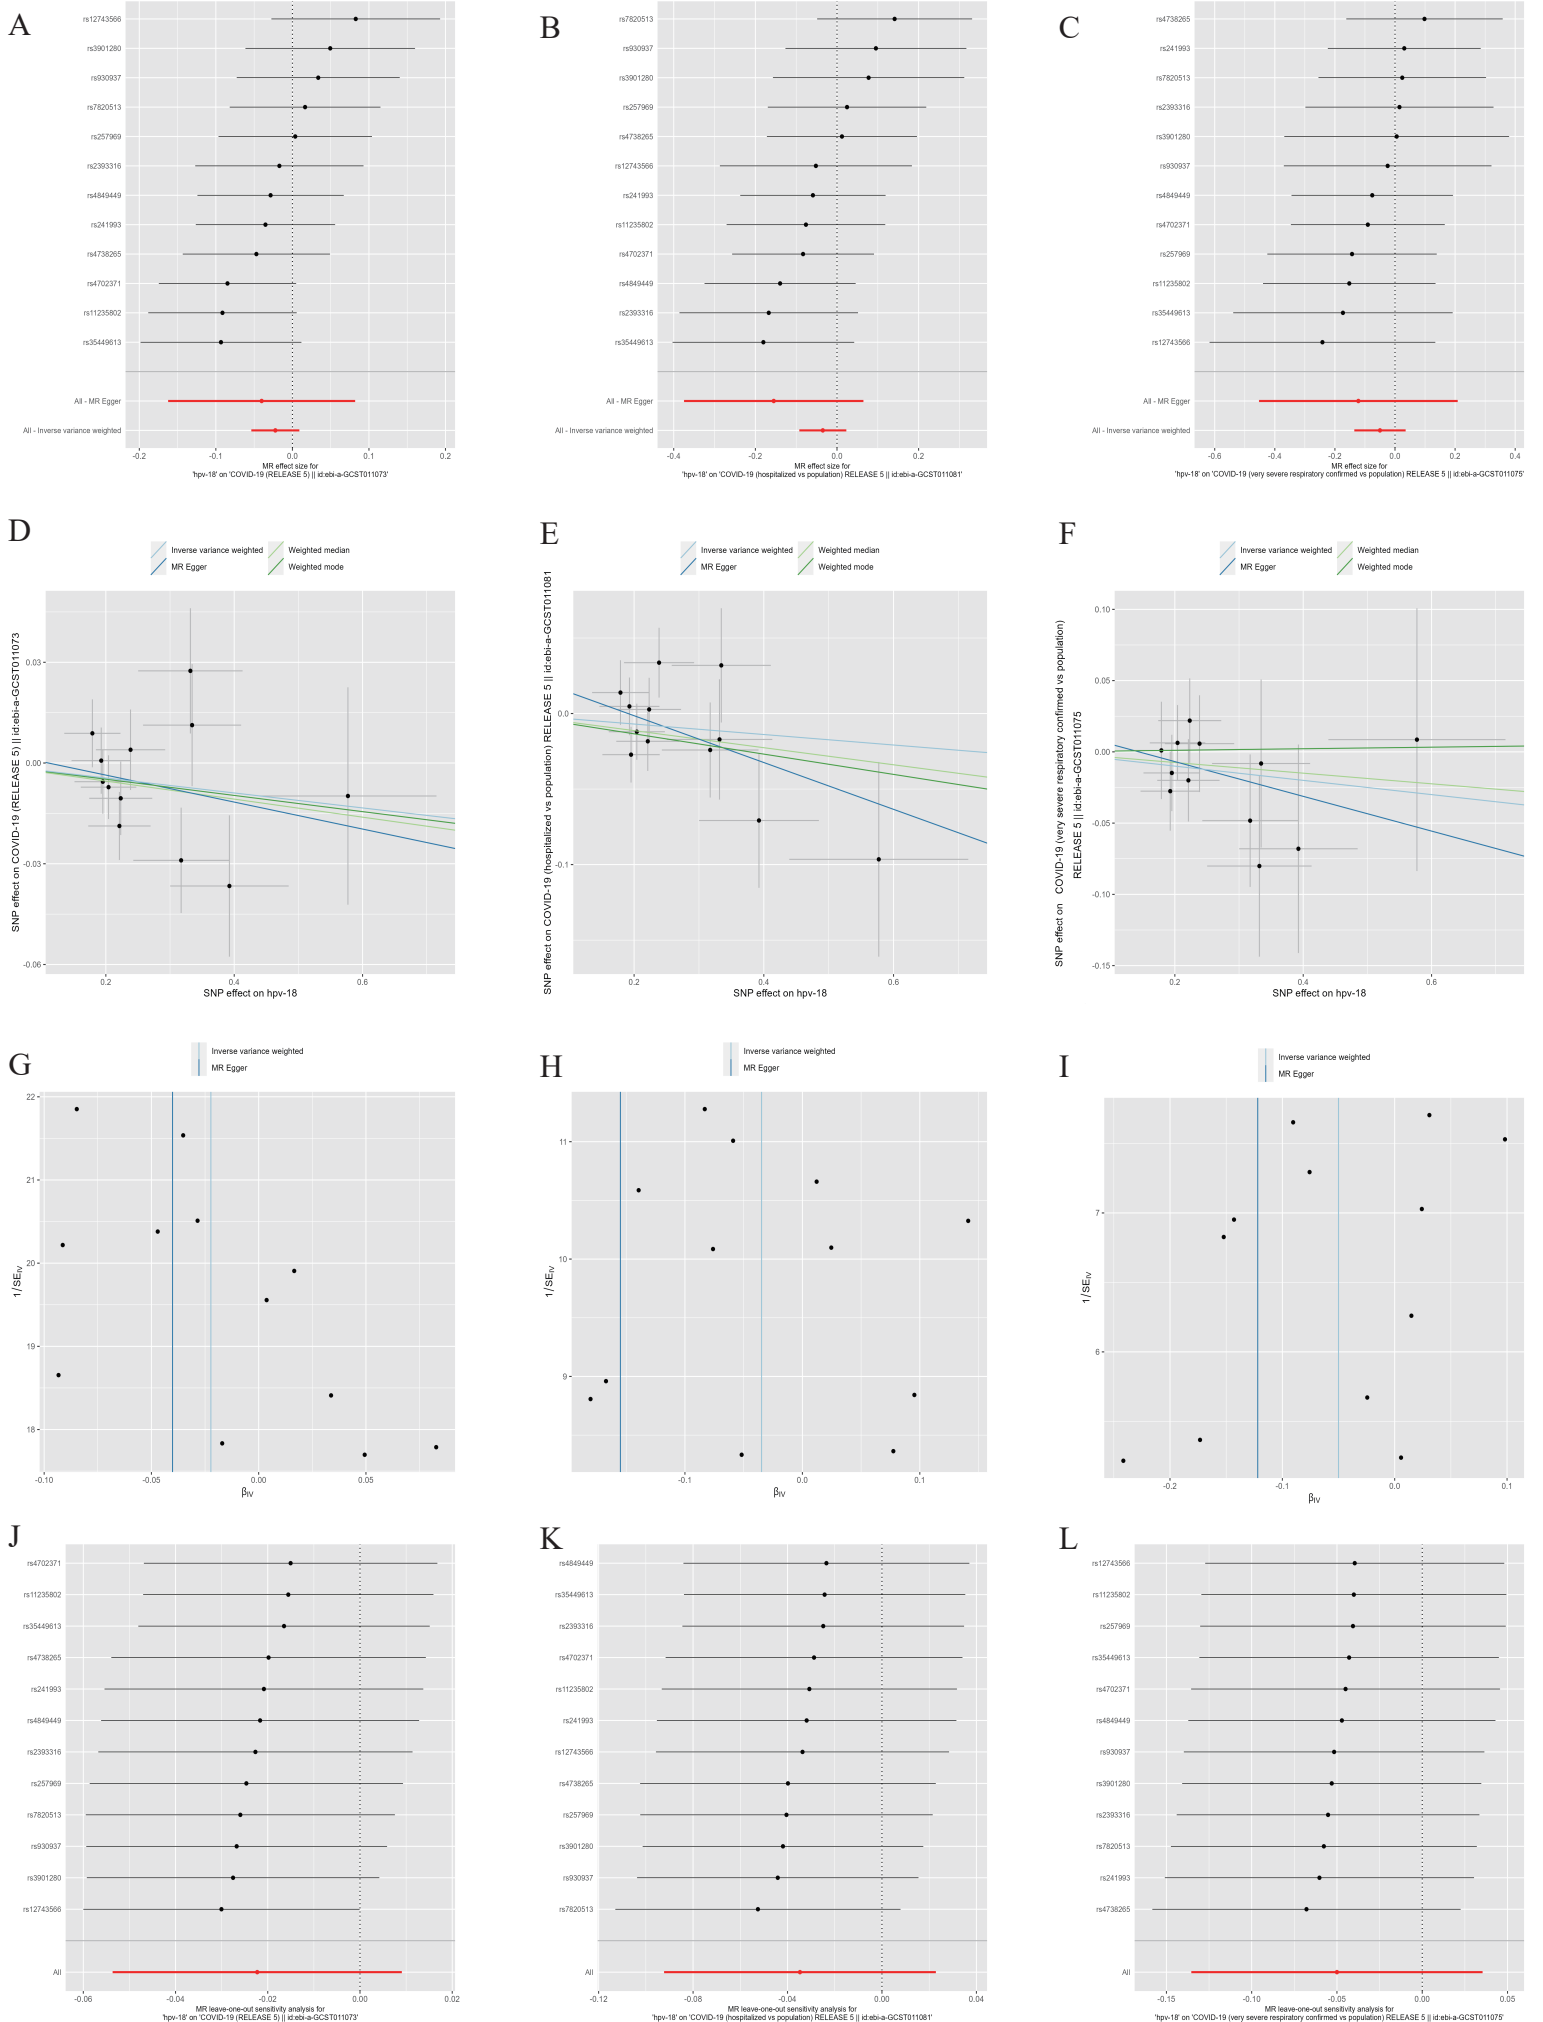

**Supplementary Figure 2.** MR estimate results of HPV-18 on outcomes

**Note:** A: Forest plot of HPV-18 on COVID-19; B: Forest plot of HPV-18 on hospitalized COVID-19; C: Forest plot of HPV-18 on severe COVID-19;

D: Scatter plot of HPV-18 on COVID-19; E: Scatter plot of HPV-18 on hospitalized COVID-19; F: Scatter plot of HPV-18 on severe COVID-19;

G: Funnel plot of HPV-18 on COVID-19; H: Funnel plot of HPV-18 on hospitalized COVID-19; I: Funnel plot of HPV-18 on severe COVID-19;

J: Leave-one-out plot of HPV-18 on COVID-19; K: Leave-one-out plot of HPV-18 on hospitalized COVID-19; L: Leave-one-out plot of HPV-18 on severe COVID-19;

MR: Mendelian randomization; HPV-18: human papillomavirus type 18; COVID-19: coronavirus disease 2019.

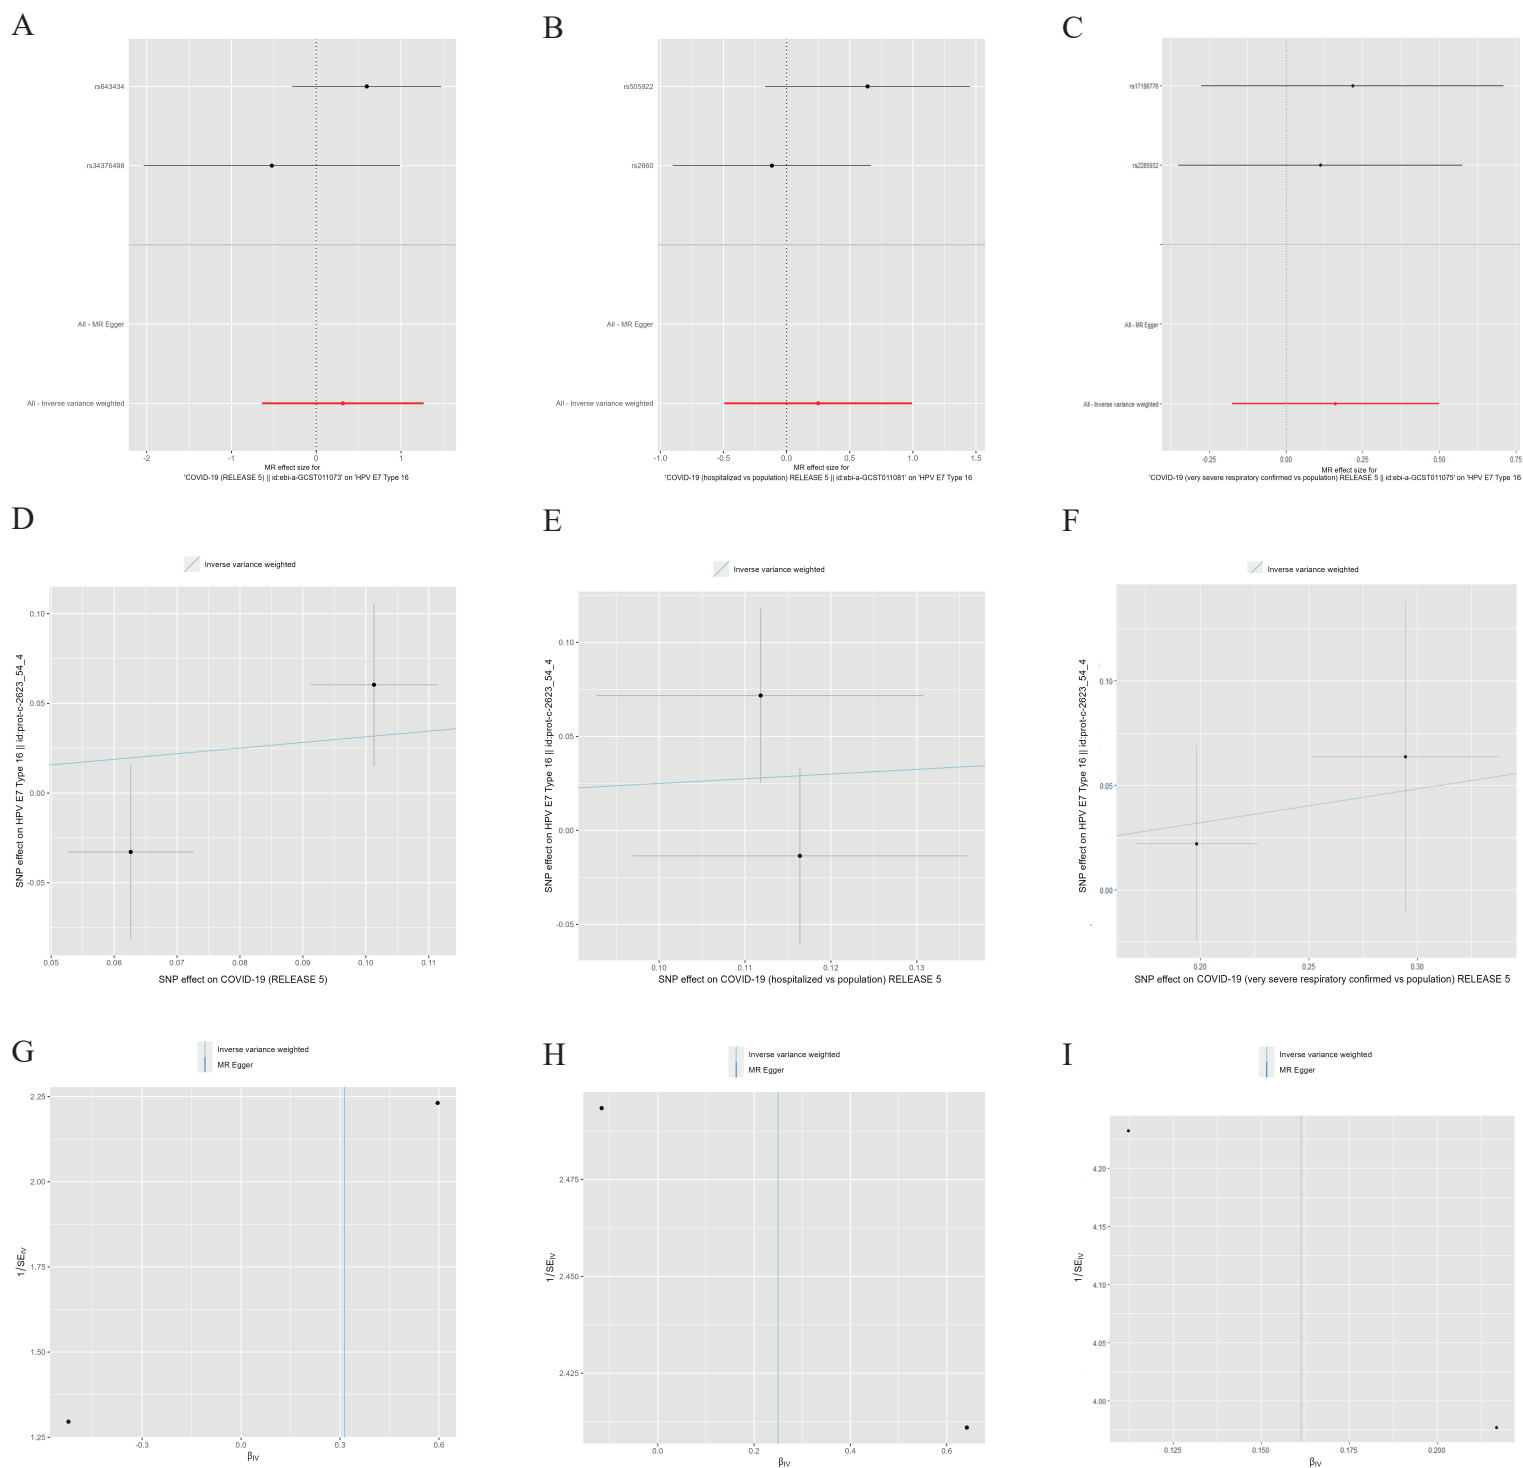

**Supplementary Figure 3. MR estimate results of COVID-19 on HPV-16**

**Note:** A: Forest plot of COVID-19 on HPV-16; B: Forest plot of hospitalized COVID-19 on HPV-16; C: Forest plot of severe COVID-19 on HPV-16; D: Scatter plot of COVID-19 on HPV-16; E: Scatter plot of hospitalized COVID-19 on HPV-16; F: Scatter plot of severe COVID-19 on HPV-16; G: Funnel plot of COVID-19 on HPV-16; H: Funnel plot of hospitalized COVID-19 on HPV-16; I: Funnel plot of severe COVID-19 on HPV-16; MR: Mendelian randomization; HPV-16: human papillomavirus type 16; COVID-19: coronavirus disease 2019.

A

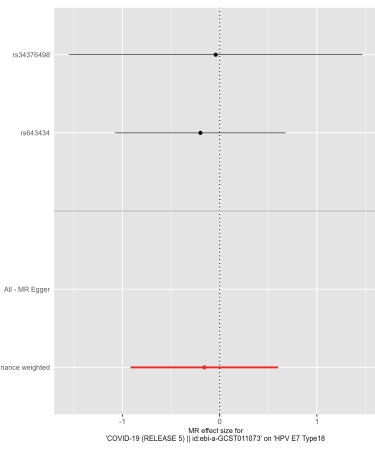

B

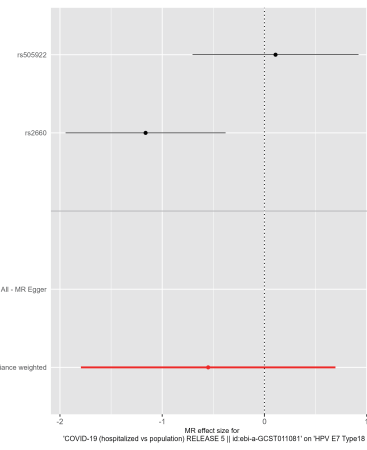

C

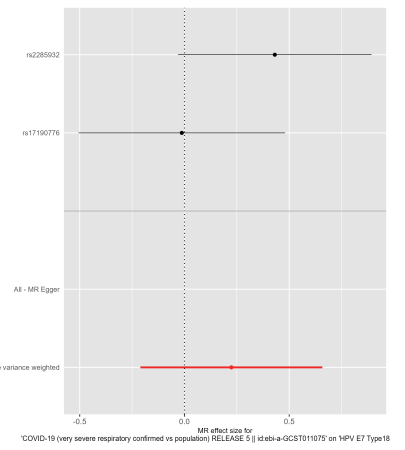

D

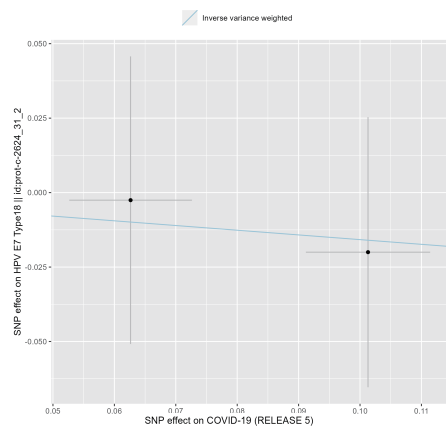

E

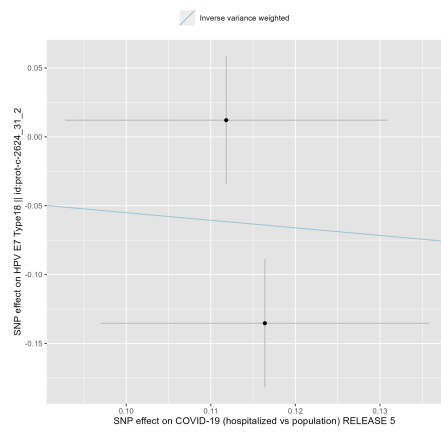

F

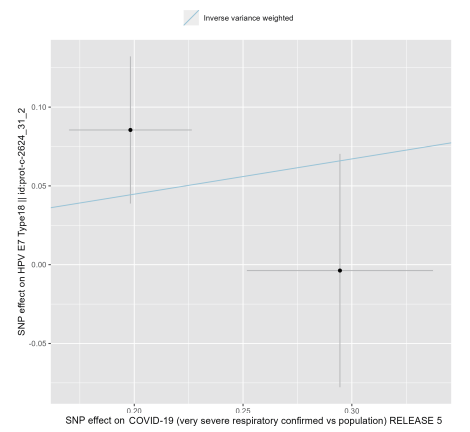

G

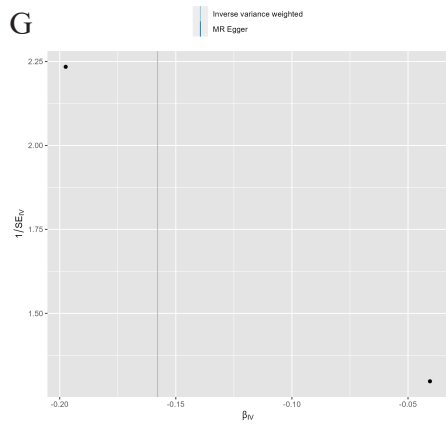

H

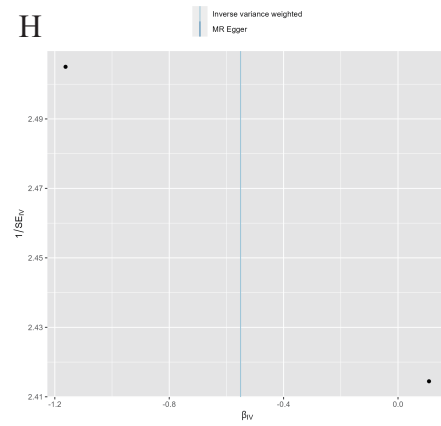

I

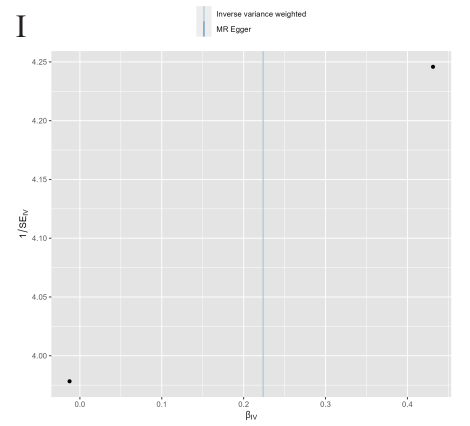

### Supplementary Figure 4. MR estimate results of COVID-19 on HPV-18

**Note:** A: Forest plot of COVID-19 on HPV-18; B: Forest plot of hospitalized COVID-19 on HPV-18; C: Forest plot of severe COVID-19 on HPV-18; D: Scatter plot of COVID-19 on HPV-18; E: Scatter plot of hospitalized COVID-19 on HPV-18; F: Scatter plot of severe COVID-19 on HPV-18; G: Funnel plot of COVID-19 on HPV-18; H: Funnel plot of hospitalized COVID-19 on HPV-18; I: Funnel plot of severe COVID-19 on HPV-18; MR: Mendelian randomization; HPV-18: human papillomavirus type 18; COVID-19: coronavirus disease 2019.
